# Supplementary material
Source: PubMed Central journal article supplement (PMC4817682)
Supplement: ismej2015135x1.pdf [file ismej2015135x1.pdf]

## Taxonomy

|                                                                                                                       | T0    | T2a   | T2b   | T4a   | T4b   | T6a  | T8a   | T8b   |
|-----------------------------------------------------------------------------------------------------------------------|-------|-------|-------|-------|-------|------|-------|-------|
| k__Archaea;p__Euryarchaeota;c__Thermoplasmata;o__E2;f__Marine group II;g__                                            | 0.18  | 0     | 0     | 0     | 0     | 0    | 0     | 0     |
| k__Bacteria;p__Actinobacteria;c__Actinobacteria (class);o__Acidimicrobiales;f__wb1_P06;g__                            | 0     | 0.01  | 0     | 0     | 0     | 0    | 0     | 0     |
| k__Bacteria;p__Actinobacteria;c__Actinobacteria (class);o__Actinomycetales;f__g__                                     | 0     | 0.16  | 0     | 0.14  | 0.03  | 0    | 0.04  | 0.01  |
| k__Bacteria;p__Actinobacteria;c__Actinobacteria (class);o__Actinomycetales;f__Microbacteriaceae;g__Microcella         | 0     | 0.03  | 0     | 0.02  | 0     | 0    | 0     | 0     |
| k__Bacteria;p__Actinobacteria;c__Actinobacteria (class);o__Actinomycetales;f__Micrococccaceae;g__Arthrobacter         | 0     | 0.02  | 0     | 0     | 0     | 0    | 0.04  | 0     |
| k__Bacteria;p__Actinobacteria;c__Actinobacteria (class);o__Bifidobacteriales;f__Bifidobacteriaceae;g__Bifidobacterium | 0     | 0.02  | 0     | 0     | 0     | 0    | 0     | 0     |
| k__Bacteria;p__Actinobacteria;c__Actinobacteria (class);o__koll13;f__g__                                              | 4.43  | 0.06  | 0     | 0.04  | 0     | 0.04 | 0     | 0.01  |
| k__Bacteria;p__Bacteroidetes;c__Flavobacteria;o__f__g__                                                               | 1.82  | 2.82  | 0     | 0.12  | 0.55  | 0.11 | 0.12  | 0.02  |
| k__Bacteria;p__Bacteroidetes;c__Flavobacteria;o__Flavobacteriales;f__Cryomorphaceae;g__Fluviicola                     | 0.8   | 0.22  | 0     | 0     | 0.08  | 0.04 | 0.04  | 0     |
| k__Bacteria;p__Bacteroidetes;c__Flavobacteria;o__Flavobacteriales;f__Flavobacteriaceae;g__                            | 4.82  | 11.16 | 2.04  | 2.47  | 3.46  | 0.49 | 1.34  | 0.53  |
| k__Bacteria;p__Bacteroidetes;c__Flavobacteria;o__Flavobacteriales;f__Flavobacteriaceae;g__Arenibacter                 | 0.02  | 0     | 0     | 0     | 0     | 0    | 0     | 0.01  |
| k__Bacteria;p__Bacteroidetes;c__Flavobacteria;o__Flavobacteriales;f__Flavobacteriaceae;g__Maribacter                  | 0.1   | 0.07  | 4.08  | 0.22  | 0.37  | 0.49 | 2.97  | 9.23  |
| k__Bacteria;p__Bacteroidetes;c__Flavobacteria;o__Flavobacteriales;f__Flavobacteriaceae;g__Muricauda                   | 0     | 0.01  | 0     | 0.06  | 0     | 0    | 0     | 0.4   |
| k__Bacteria;p__Bacteroidetes;c__Flavobacteria;o__Flavobacteriales;f__Flavobacteriaceae;g__Polaribacter                | 0.06  | 0.11  | 2.04  | 0.26  | 0.63  | 0.18 | 0.45  | 0.09  |
| k__Bacteria;p__Bacteroidetes;c__Flavobacteria;o__Flavobacteriales;f__Flavobacteriaceae;g__Salegentibacter             | 0.1   | 0     | 0     | 0     | 0     | 0    | 0     | 0     |
| k__Bacteria;p__Bacteroidetes;c__Flavobacteria;o__Flavobacteriales;f__Flavobacteriaceae;g__Sediminicola                | 0     | 0     | 0     | 0.04  | 0     | 0    | 0     | 0.04  |
| k__Bacteria;p__Bacteroidetes;c__Flavobacteria;o__Flavobacteriales;f__Flavobacteriaceae;g__Tenacibaculum               | 0     | 0.02  | 0     | 0     | 0     | 0    | 0.08  | 0     |
| k__Bacteria;p__Bacteroidetes;c__Flavobacteria;o__Flavobacteriales;f__Flavobacteriaceae;g__Ulvibacter                  | 0     | 0.01  | 0     | 0     | 0     | 0    | 0     | 0     |
| k__Bacteria;p__Bacteroidetes;c__Flavobacteria;o__Flavobacteriales;f__Flavobacteriaceae;g__Zobellia                    | 0     | 0     | 0     | 0     | 0.03  | 0    | 0     | 0.02  |
| k__Bacteria;p__Bacteroidetes;c__Sphingobacteria;o__Sphingobacteriales;f__g__                                          | 0.12  | 0.09  | 0     | 0.04  | 0     | 0    | 0     | 0.02  |
| k__Bacteria;p__Bacteroidetes;c__Sphingobacteria;o__Sphingobacteriales;f__Saprospiraceae;g__                           | 0.04  | 0.13  | 0     | 0.12  | 0.32  | 0    | 0.04  | 0.04  |
| k__Bacteria;p__Cyanobacteria;c__o__f__g__                                                                             | 1.92  | 0.05  | 0     | 0.63  | 0.4   | 0.04 | 0.16  | 0.16  |
| k__Bacteria;p__Cyanobacteria;c__o__Chroococcales;f__g__                                                               | 1.33  | 1.05  | 0     | 0.24  | 0.18  | 0.04 | 0     | 0.02  |
| k__Bacteria;p__Cyanobacteria;c__o__Chroococcales;f__g__Synechococcus                                                  | 13.19 | 7.79  | 2.04  | 2.08  | 2.11  | 0.63 | 1.46  | 4.03  |
| k__Bacteria;p__Cyanobacteria;c__o__Chroococcales;f__Prochlorococcaceae;g__Prochlorococcus                             | 3.71  | 0     | 0     | 0.02  | 0.08  | 0    | 0.04  | 0.03  |
| k__Bacteria;p__Firmicutes;c__Bacilli;o__Bacillales;f__Bacillaceae;g__                                                 | 0.02  | 0     | 0     | 0     | 0     | 0    | 0     | 0.02  |
| k__Bacteria;p__Firmicutes;c__Bacilli;o__Bacillales;f__Bacillaceae;g__Anoxybacillus                                    | 0     | 0     | 0     | 0.02  | 0.03  | 0    | 0     | 0.04  |
| k__Bacteria;p__Firmicutes;c__Bacilli;o__Bacillales;f__Bacillaceae;g__Salimicrobium                                    | 0.04  | 0     | 0     | 0     | 0     | 0    | 0     | 0     |
| k__Bacteria;p__Firmicutes;c__Clostridia;o__Clostridiales;f__g__                                                       | 0     | 0.01  | 0     | 0     | 0.03  | 0    | 0     | 0     |
| k__Bacteria;p__Firmicutes;c__Clostridia;o__Clostridiales;f__Lachnospiraceae;g__                                       | 0     | 0.02  | 0     | 0     | 0     | 0    | 0     | 0     |
| k__Bacteria;p__Firmicutes;c__Clostridia;o__Clostridiales;f__Lachnospiraceae;g__Blautia                                | 0.02  | 0.03  | 0     | 0     | 0     | 0    | 0     | 0     |
| k__Bacteria;p__Firmicutes;c__Clostridia;o__Clostridiales;f__Ruminococcaceae;g__Faecalibacterium                       | 0     | 0.01  | 0     | 0     | 0     | 0    | 0     | 0     |
| k__Bacteria;p__Firmicutes;c__Clostridia;o__Clostridiales;f__Veillonellaceae;g__                                       | 0.02  | 0.01  | 0     | 0     | 0     | 0    | 0     | 0     |
| k__Bacteria;p__Marine group A;c__o__f__g__                                                                            | 0.41  | 0     | 0     | 0.02  | 0.03  | 0    | 0     | 0     |
| k__Bacteria;p__Planctomycetes;c__Planctomycea;o__Pirellulales;f__g__Rhodopirellula                                    | 0.04  | 0.07  | 0     | 0.1   | 0.13  | 0    | 0.2   | 0.23  |
| k__Bacteria;p__Planctomycetes;c__Planctomycea;o__Pirellulales;f__Pirellulaceae;g__                                    | 0.39  | 1.93  | 0     | 2     | 1.74  | 0.07 | 0.73  | 0.56  |
| k__Bacteria;p__Proteobacteria;c__Alphaproteobacteria;o__Rhizobiales;f__Cohaesibacteraceae;g__Cohaesibacter            | 0     | 0     | 0     | 0     | 0     | 0    | 0     | 0.04  |
| k__Bacteria;p__Proteobacteria;c__Alphaproteobacteria;o__Rhizobiales;f__Rhodobacteraceae;g__                           | 0     | 0     | 0     | 0.04  | 0     | 0    | 0.04  | 0.06  |
| k__Bacteria;p__Proteobacteria;c__Alphaproteobacteria;o__Rhodobacterales;f__Hyphomonadaceae;g__                        | 0.02  | 0.01  | 0     | 0.08  | 0.05  | 0.07 | 0.12  | 0.12  |
| k__Bacteria;p__Proteobacteria;c__Alphaproteobacteria;o__Rhodobacterales;f__Hyphomonadaceae;g__Hirschia                | 0.02  | 0.02  | 0     | 0.04  | 0.13  | 0.07 | 0.2   | 0.59  |
| k__Bacteria;p__Proteobacteria;c__Alphaproteobacteria;o__Rhodobacterales;f__Hyphomonadaceae;g__Hyphomonas              | 0     | 0     | 0     | 0     | 0.03  | 0.04 | 0.04  | 0.15  |
| k__Bacteria;p__Proteobacteria;c__Alphaproteobacteria;o__Rhodobacterales;f__Rhodobacteraceae;g__                       | 3.47  | 32.59 | 52.04 | 47.46 | 47.87 | 58.2 | 59.08 | 56.97 |
| k__Bacteria;p__Proteobacteria;c__Alphaproteobacteria;o__Rhodobacterales;f__Rhodobacteraceae;g__Loktanella             | 0     | 0.34  | 0     | 0.02  | 0.05  | 0.04 | 0.04  | 0.17  |
| k__Bacteria;p__Proteobacteria;c__Alphaproteobacteria;o__Rhodobacterales;f__Rhodobacteraceae;g__Marinovum              | 0.02  | 0.07  | 0     | 0.1   | 0.05  | 0.04 | 0.12  | 0.07  |
| k__Bacteria;p__Proteobacteria;c__Alphaproteobacteria;o__Rhodobacterales;f__Rhodobacteraceae;g__Nautella               | 0.02  | 1.09  | 0     | 2.59  | 3.12  | 4.47 | 6.3   | 2.23  |
| k__Bacteria;p__Proteobacteria;c__Alphaproteobacteria;o__Rhodobacterales;f__Rhodobacteraceae;g__Nereida                | 0     | 2.17  | 0     | 0.59  | 0.74  | 0.39 | 0.12  | 0.04  |

|                                                                                                                    |       |       |       |      |      |       |       |      |
|--------------------------------------------------------------------------------------------------------------------|-------|-------|-------|------|------|-------|-------|------|
| k__Bacteria;p__Proteobacteria;c__Alphaproteobacteria;o__Rhodobacterales;f__Rhodobacteraceae;g__Oceanicola          | 0.04  | 0.22  | 1.02  | 0.71 | 0.98 | 0.7   | 1.26  | 0.12 |
| k__Bacteria;p__Proteobacteria;c__Alphaproteobacteria;o__Rhodobacterales;f__Rhodobacteraceae;g__Octadecabacter      | 0     | 0.02  | 0     | 0    | 0    | 0     | 0     | 0    |
| k__Bacteria;p__Proteobacteria;c__Alphaproteobacteria;o__Rhodobacterales;f__Rhodobacteraceae;g__Phaeobacter         | 0.18  | 1.97  | 5.1   | 8.95 | 8.01 | 6.51  | 8.37  | 12.2 |
| k__Bacteria;p__Proteobacteria;c__Alphaproteobacteria;o__Rhodobacterales;f__Rhodobacteraceae;g__Pseudoruegeria      | 0     | 0.06  | 0     | 0.2  | 0.16 | 0.07  | 0     | 0    |
| k__Bacteria;p__Proteobacteria;c__Alphaproteobacteria;o__Rhodobacterales;f__Rhodobacteraceae;g__Roseovarius         | 0     | 0     | 0     | 0    | 0    | 0     | 0.16  | 0    |
| k__Bacteria;p__Proteobacteria;c__Alphaproteobacteria;o__Rhodobacterales;f__Rhodobacteraceae;g__Ruegeria            | 0.02  | 0.06  | 0     | 0.12 | 0.13 | 0     | 0.12  | 0.12 |
| k__Bacteria;p__Proteobacteria;c__Alphaproteobacteria;o__Rhodobacterales;f__Rhodobacteraceae;g__Shimia              | 0.24  | 2.34  | 6.12  | 7.87 | 6.95 | 13.44 | 2.07  | 1.75 |
| k__Bacteria;p__Proteobacteria;c__Alphaproteobacteria;o__Rhodobacterales;f__Rhodobacteraceae;g__Sulfitobacter       | 0.08  | 2.24  | 6.12  | 6.07 | 8.01 | 10.1  | 10.28 | 8.89 |
| k__Bacteria;p__Proteobacteria;c__Alphaproteobacteria;o__Rhodobacterales;f__Rhodobacteraceae;g__Thalassobacter      | 0.02  | 1.2   | 0     | 0.28 | 0.16 | 0.11  | 0.08  | 0.02 |
| k__Bacteria;p__Proteobacteria;c__Alphaproteobacteria;o__Rhodobacterales;f__Rhodobacteraceae;g__Thalassobius        | 0.06  | 2.66  | 0     | 1.96 | 1.98 | 1.34  | 0.85  | 0.13 |
| k__Bacteria;p__Proteobacteria;c__Alphaproteobacteria;o__Rhodospirillales;f__Rhodospirillaceae;g__                  | 2.39  | 0.04  | 0     | 0    | 0.03 | 0.04  | 0.12  | 0    |
| k__Bacteria;p__Proteobacteria;c__Alphaproteobacteria;o__Rickettsiales;f__g__Candidatus Pelagibacter                | 40.97 | 0.44  | 4.08  | 0.77 | 1.06 | 0.67  | 0.69  | 0.12 |
| k__Bacteria;p__Proteobacteria;c__Alphaproteobacteria;o__Sphingomonadales;f__g__                                    | 0     | 0.01  | 2.04  | 0    | 0    | 0     | 0     | 0    |
| k__Bacteria;p__Proteobacteria;c__Alphaproteobacteria;o__Sphingomonadales;f__Erythrobacteraceae;g__Erythrobacter    | 0     | 0     | 0     | 0.02 | 0    | 0     | 0     | 0    |
| k__Bacteria;p__Proteobacteria;c__Alphaproteobacteria;o__Sphingomonadales;f__Sphingomonadaceae;g__Sphingobium       | 0     | 0     | 0     | 0    | 0    | 0     | 0     | 0.03 |
| k__Bacteria;p__Proteobacteria;c__Betaproteobacteria;o__Burkholderiales;f__Comamonadaceae;g__Brachymonas            | 0.02  | 0.02  | 0     | 0    | 0    | 0     | 0     | 0    |
| k__Bacteria;p__Proteobacteria;c__Betaproteobacteria;o__Burkholderiales;f__Comamonadaceae;g__Comamonas              | 0.04  | 0.01  | 0     | 0    | 0    | 0     | 0     | 0    |
| k__Bacteria;p__Proteobacteria;c__Betaproteobacteria;o__Rhodocyclales;f__g__                                        | 0.08  | 0     | 0     | 0    | 0    | 0     | 0     | 0    |
| k__Bacteria;p__Proteobacteria;c__Deltaproteobacteria;o__f__g__                                                     | 0.33  | 0     | 0     | 0    | 0.05 | 0     | 0     | 0    |
| k__Bacteria;p__Proteobacteria;c__Gammaproteobacteria;o__f__g__                                                     | 0.84  | 0.07  | 0     | 0    | 0.03 | 0.04  | 0     | 0    |
| k__Bacteria;p__Proteobacteria;c__Gammaproteobacteria;o__Alteromonadales;f__Alteromonadaceae;g__                    | 0     | 0.02  | 0     | 0.2  | 0.08 | 0     | 0     | 0.02 |
| k__Bacteria;p__Proteobacteria;c__Gammaproteobacteria;o__Alteromonadales;f__Alteromonadaceae;g__Alteromonas         | 0.18  | 1.37  | 0     | 7.71 | 3.8  | 0.07  | 0.12  | 0.12 |
| k__Bacteria;p__Proteobacteria;c__Gammaproteobacteria;o__Alteromonadales;f__Alteromonadaceae;g__Glaciecola          | 3.71  | 14.67 | 12.24 | 2.08 | 2.27 | 0.56  | 0.73  | 0.24 |
| k__Bacteria;p__Proteobacteria;c__Gammaproteobacteria;o__Alteromonadales;f__Colwelliaceae;g__Thalassomonas          | 0.04  | 0.01  | 0     | 0    | 0.03 | 0     | 0     | 0.01 |
| k__Bacteria;p__Proteobacteria;c__Gammaproteobacteria;o__Alteromonadales;f__Idiomarinaceae;g__Idiomarina            | 0.1   | 0     | 0     | 0    | 0    | 0     | 0     | 0    |
| k__Bacteria;p__Proteobacteria;c__Gammaproteobacteria;o__Legionellales;f__g__                                       | 0     | 0     | 0     | 0    | 0    | 0     | 0.04  | 0.05 |
| k__Bacteria;p__Proteobacteria;c__Gammaproteobacteria;o__Legionellales;f__Coxiellaceae;g__                          | 0     | 0.03  | 0     | 0.06 | 0.11 | 0     | 0     | 0.02 |
| k__Bacteria;p__Proteobacteria;c__Gammaproteobacteria;o__Oceanospirillales;f__g__                                   | 2.88  | 0.82  | 0     | 0.47 | 0.26 | 0.25  | 0.16  | 0.12 |
| k__Bacteria;p__Proteobacteria;c__Gammaproteobacteria;o__Oceanospirillales;f__Alteromonadaceae;g__Marinobacter      | 0.43  | 0.11  | 0     | 0.59 | 0.74 | 0     | 0.24  | 0.02 |
| k__Bacteria;p__Proteobacteria;c__Gammaproteobacteria;o__Oceanospirillales;f__Halomonadaceae;g__Candidatus Portiera | 7.96  | 0.08  | 0     | 0.1  | 0.05 | 0.04  | 0.16  | 0.01 |
| k__Bacteria;p__Proteobacteria;c__Gammaproteobacteria;o__Oceanospirillales;f__Halomonadaceae;g__Halomonas           | 0.04  | 0.01  | 0     | 0    | 0.03 | 0     | 0.04  | 0    |
| k__Bacteria;p__Proteobacteria;c__Gammaproteobacteria;o__Oceanospirillales;f__Oceanospirillaceae;g__                | 0.8   | 8.14  | 1.02  | 1.74 | 2.67 | 0.63  | 0.69  | 0.04 |
| k__Bacteria;p__Proteobacteria;c__Gammaproteobacteria;o__Oceanospirillales;f__Oceanospirillaceae;g__Neptunomonas    | 0.02  | 0.02  | 0     | 0    | 0    | 0     | 0     | 0    |
| k__Bacteria;p__Proteobacteria;c__Gammaproteobacteria;o__Salinisphaerales;f__Salinisphaeraceae;g__Salinisphaera     | 0.04  | 0     | 0     | 0    | 0    | 0     | 0     | 0    |
| k__Bacteria;p__Proteobacteria;c__Gammaproteobacteria;o__Vibrionales;f__Vibrionaceae;g__Photobacterium              | 0     | 0.02  | 0     | 0    | 0    | 0     | 0     | 0    |
| k__Bacteria;p__Proteobacteria;c__Gammaproteobacteria;o__Vibrionales;f__Vibrionaceae;g__Vibrio                      | 0.2   | 0.22  | 0     | 0.16 | 0.08 | 0     | 0     | 0    |
| k__Bacteria;p__Proteobacteria;c__Gammaproteobacteria;o__Xanthomonadales;f__g__                                     | 0.02  | 0     | 0     | 0.02 | 0    | 0     | 0     | 0    |
| k__Bacteria;p__Proteobacteria;c__Gammaproteobacteria;o__Xanthomonadales;f__Xanthomonadaceae;g__Aquimonas           | 0     | 0     | 0     | 0.04 | 0    | 0     | 0     | 0    |
| k__Bacteria;p__Verrucomicrobia;c__Opitutae;o__Puniceococcales;f__Puniceococcaceae;g__                              | 0.63  | 0     | 0     | 0    | 0    | 0     | 0     | 0    |
| k__Bacteria;p__Verrucomicrobia;c__Verrucomicrobiae;o__Verrucomicrobiales;f__g__                                    | 0.29  | 0.01  | 0     | 0    | 0    | 0     | 0     | 0    |
| k__Bacteria;p__Verrucomicrobia;c__Verrucomicrobiae;o__Verrucomicrobiales;f__Verrucomicrobiaceae;g__                | 0.24  | 0.85  | 0     | 0.24 | 0.11 | 0.04  | 0     | 0.01 |
| k__Bacteria;p__WPS-2;c__o__f__g__                                                                                  | 0     | 0     | 0     | 0.04 | 0    | 0     | 0     | 0    |
